# Supplementary material for: Programmatic implementation of kangaroo mother care: a systematic synthesis of grey literature
Source: bioRxiv or medRxiv preprint supplement (doi:10.1101/2023.04.05.23288153), 2023-04-05
Supplement: Supplementary file [file media-3.pdf]

## Supplemental file 3

### Categories included in the MS Excel database, with screenshots

1. ID
2. Title (Open-ended)
3. Publishing 'authority' (Drop down: Independent author/s; Media house; Funding agency; Development agency; Government [specify]; Other [specify])
  - (a) If GOVERNMENT, specify
  - (b) If OTHER, specify
4. Type of document: (Drop down: Book; Report; Guidelines; Conference abstract; Conference presentation; Conference proceedings; Scientific article (peer-reviewed); Scholarly article (non-peer-reviewed or uncertain) (e.g. Perspective); 'Official' media report; Blog; Other [specify])
  - (a) If OTHER, specify
5. Authors Compilers (if listed)
6. Donor / Development support (Dropdown: YES / NO / UNSURE)  
If YES:
  - (a) Linked to a time-limited or once-off project? YES / NO / UNSURE
  - (b) Specify further (open-ended - will be clustered at a later stage if needed)
7. Country/ies (open-ended – will be clustered at a later stage if needed) If no country, use "Unknown" or "General" or another term that may emerge as relevant during the review
8. KMC coverage mentioned? YES / NO  
If YES:
  - (a) Page number(s)
  - (b) Key issues mentioned (if applicable)
  - (c) Grading of document regarding coverage:  
A = quantitative information on HIGH KMC coverage (> 50%)  
B = quantitative information on ANY KMC coverage  
C = mention of HIGH coverage without quantitative information  
D = mention of ANY coverage without quantitative information  
E = NO mention of coverage
9. KMC implementation mentioned? YES / NO  
If YES:
  - (a) Page number(s)
  - (b) Key issues mentioned
  - (c) Health system interventions mentioned? YES / NO/ UNSURE
    - (i) If YES, more detailed analysis needed? YES / NO/ UNSURE
      - If YES or UNSURE, mark the ID cell in RED
10. KMC improvement/strengthening mentioned? YES / NO  
If YES:
  - (a) Page number(s) and key issues mentioned
  - (b) Key issues mentioned
  - (c) Health system interventions mentioned? YES / NO / UNSURE
    - (i) If YES, more detailed analysis needed? YES / NO / UNSURE
      - If YES or UNSURE, mark the ID cell in RED
11. KMC scale-up mentioned? YES / NO  
If YES:
  - (a) Page number(s) and key issues mentioned
  - (b) Key issues mentioned
  - (c) Health system interventions mentioned? YES / NO / UNSURE
    - (i) If YES, more detailed analysis needed? YES / NO / UNSURE
      - If YES or UNSURE, mark the ID cell in RED
  - (d) Grading of document regarding health interventions related to KMC implementation and scale-up:  
A = detailed information on MORE THAN ONE COMPONENT of health interventions  
B = detailed information on ONLY ONE COMPONENT of health interventions  
C = mention MORE THAN ONE COMPONENT of health interventions

D = mention ONLY ONE COMPONENT of health interventions

E = NO mention of any components of health interventions

12. Quality: KMC initiation mentioned? YES / NO / UNSURE  
If YES or UNSURE: (a) Describe:
13. Quality: KMC dose (e.g. hours per day) mentioned? YES / NO / UNSURE  
If YES or UNSURE: (a) Describe:
14. Quality: KMC duration (number of days) mentioned? YES / NO / UNSURE  
If YES or UNSURE: (a) Describe:
15. Availability of KMC services (number of facilities providing KMC) mentioned? YES / NO / UNSURE  
If YES: (a) Numbers mentioned? YES / NO  
(i) If YES, describe (including if any comparison with total number of facilities with maternity and neonatal services):
16. First analysis completed? YES (when done) (Mark cell in GREEN) (Continue with an in-depth analysis of documents marked red in the ID cell)

## EXAMPLES OF SCREENSHOTS

### (AB) Abstracts (also posters, summaries & working groups)

|    | A     | B                                            | C                    | F                        | G               | H                  | I                   | M                | N                    | O         | P                       | Q          | R                          |
|----|-------|----------------------------------------------|----------------------|--------------------------|-----------------|--------------------|---------------------|------------------|----------------------|-----------|-------------------------|------------|----------------------------|
|    | 1 ID  | 2 Title                                      | 3 Name of conference | Date published/presented | 4 Document type | 4a Other (specify) | 5 Authors/compilers | 7 Country/ies    | 8 Coverage mentioned | 8a Page # | 8b Key issues           | 8c Grading | 9 Implementation mentioned |
| 1  |       |                                              |                      |                          |                 |                    |                     |                  |                      |           |                         |            |                            |
| 33 | AB31a | Workshop on Kangaroo Mother Care: lessons    | KMC Conference, Trie | 2016                     | Report          | Working group      | Pr Djamil LEBA      | Algeria          | YES                  | 1         | Low facility-based cove | D          | YES                        |
| 34 | AB31b | ROUND TABLE: BARRIERS AND ENABLERS OF CO     | KMC Conference, Trie | 2017                     | Report          | Round table        | Pr Djamil LEBA      | Algeria          | NO                   | -         | -                       | E          | YES                        |
| 35 | AB32  | Brazil                                       | KMC Conference, Trie | 2016                     | Report          | Working group      | No name             | Brazil           | YES                  | 1-2       | Services & beds         | C          | YES                        |
| 36 | AB33a | CONSTRAINTS AND BARRIERS TO IMPLEMENTA       | KMC Conference, Trie | 2016                     | Report          | Working group      | NOUTCHOGOU          | Cameroon         | NO                   | -         | -                       | E          | YES                        |
| 37 | AB33b | Diagrams Laquintinie Hospital                | KMC Conference, Trie | 2017                     | Report          | Working group      | No name             | Cameroon         | NO                   | -         | -                       | E          | NO                         |
| 38 | AB34  | COLOMBIA                                     | KMC Conference, Trie | 2016                     | Report          | Working group      | No name             | Colombia         | YES                  | 1-2       | Population-based: 80%   | A          | YES                        |
| 39 | AB35  | Enablers and Challenges of Kangaroo Mother   | KMC Conference, Trie | 2016                     | Report          | Working group      | Shashi N. Vani      | India            | YES                  | 3         | Facility-based: 13.2%   | B          | YES                        |
| 40 | AB36a | KMC state of the art - Italy                 | KMC Conference, Trie | 2016                     | Report          | Working group      | No name             | Italy            | NO                   | -         | -                       | E          | YES                        |
| 41 | AB36b | Rountable less successful countries, 14 Nov  | KMC Conference, Trie | 2016                     | Report          | Round table        | Immacolata Da       | Italy            | NO                   | -         | -                       | E          | YES                        |
| 42 | AB37  | KMC Workshop Italy 2016                      | KMC Conference, Trie | 2016                     | Report          | Working group      | (Mantoa Mock        | South Africa     | NO                   | -         | -                       | E          | YES                        |
| 43 | AB38  | Group work on enablers and barriers, 14 Nov  | KMC Conference, Trie | 2016                     | Report          | Working group      | (Mantoa Mock        | SSA (Cameroon    | NO                   | -         | -                       | E          | YES                        |
| 44 | AB39  | Application of KMC in Sweden                 | KMC Conference, Trie | 2016                     | Report          | Working group      | Kerstin Hedber      | Sweden           | INDIRECTLY           | 1-2       | Services                | E          | YES                        |
| 45 | AB40  | Kangaroo mother care in Viet Nam: an overvie | KMC Conference, Trie | 2016                     | Report          | Working group      | MCH Dept., Mi       | Vietnam          | YES                  | 2         | Facility-based coverage | B          | YES                        |
| 46 | AB41  | Group work on enablers and barriers, 14 Nov  | KMC Conference, Trie | 2016                     | Report          | Working group      | No name             | Brazil, India    | NO                   | -         | -                       | E          | YES                        |
| 47 | AB42  | Group work on enablers and barriers, 14 Nov  | KMC Conference, Trie | 2016                     | Report          | Working group      | No name             | Italy, Sweden, F | NO                   | -         | -                       | E          | YES                        |
| 48 | AB43  | Work group on enablers and barriers, 14 Nov  | KMC Conference, Trie | 2016                     | Report          | Working group      | No name             | Pakistan, Mada   | NO                   | -         | -                       | E          | YES                        |
| 49 | AB44  | Group workshop on enablers and barriers, 14  | KMC Conference, Trie | 2016                     | Report          | Working group      | Nathaniel Foot      | Vietnam, Color   | NO                   | -         | -                       | E          | YES                        |
| 50 | AB45  | Training workshop                            | KMC Conference, Trie | 2016                     | Report          | Working group      | N Charpak, Ma       | Colombia / USA   | NO                   | -         | -                       | E          | NO                         |
| 51 |       |                                              |                      |                          |                 |                    |                     |                  |                      |           |                         |            |                            |
| 52 | 16    |                                              |                      |                          |                 |                    |                     |                  |                      |           |                         |            |                            |
| 53 | 32.7% |                                              |                      | Book                     | 0               |                    | REPORT              |                  | 7 YES                |           | A                       | 1          | 41                         |
| 54 |       |                                              | 36.73%               | Report                   | 18              | 2                  | Round table         |                  | 34 NO                |           | B                       | 4          | 7                          |
| 55 |       |                                              | 46.94%               | Conf abstract            | 23              | 16                 | Working groups      |                  | 0 UNSURE             |           | C                       | 1          |                            |
| 56 |       |                                              |                      | Conf presentati          | 0               |                    |                     |                  | 0 N/A                |           | D                       | 6          |                            |
| 57 |       |                                              |                      | Peer-reviewed a          | 0               |                    |                     |                  | 7 INDIRECTLY         |           | E                       | 36         |                            |
| 58 |       |                                              |                      | Article non-peer         | 0               |                    |                     |                  | 1 Missing            |           | Missing                 | 1          | 1                          |
| 59 |       |                                              |                      | Media report (o          | 0               |                    |                     |                  | 49 Total             |           | Total                   | 49         | 49                         |
| 60 |       |                                              |                      | Blog                     | 0               |                    |                     |                  |                      |           |                         |            |                            |
| 61 |       |                                              | 16.33%               | Other                    | 8               |                    | OTHER               |                  |                      |           |                         |            |                            |
| 62 |       |                                              |                      | Total                    | 49              | 1                  | Conference summary  |                  |                      |           |                         |            |                            |
| 63 |       |                                              |                      |                          |                 | 7                  | Poster              |                  |                      |           |                         |            |                            |
| 64 |       |                                              |                      |                          |                 |                    |                     |                  |                      |           |                         |            |                            |
| 65 |       |                                              |                      |                          |                 |                    |                     |                  |                      |           |                         |            |                            |

(AB) Abstracts (49)

(AS) Assessments (31)

(R) Reports (53)

(SP) Slides & pres (60)

(SC) Scal ...

## (AS) Assessments, evaluations and reviews

| A    | B                                                   | N                    | O           | P                        | Q          | R                          | S           | T                     | U                                 | V                   | W                                 | X           |     |
|------|-----------------------------------------------------|----------------------|-------------|--------------------------|------------|----------------------------|-------------|-----------------------|-----------------------------------|---------------------|-----------------------------------|-------------|-----|
| 1 ID | 2 Title                                             | 8 Coverage mentioned | 8a Page #   | 8b Key issues            | 8c Grading | 9 Implementation mentioned | 9a Page #   | 9b Key issues         | 9c H.syst interventions mentioned | 9ci Analysis needed | 10 Improve/Strengthen (mentioned) | 10a Page #  |     |
| 2    | AS1 REVIEW OF KANGAROO MOTHER CARE IMPLEMEN         | YES                  | 8           | Services                 | D          | YES                        | Various pa  | Stages of change mod  | YES                               | YES                 | YES                               | Throughout  |     |
| 3    | AS2 To explore the feasibility of introduction and  | NO                   | -           | -                        | E          | YES                        | 11, 21-32   | Service Provision Ass | INDIRECTLY                        | UNSURE              | NO                                | -           |     |
| 4    | AS3 BANGLADESH National Newborn Health Situat       | NO                   | -           | -                        | E          | YES                        | 48          | Summary table of im   | YES                               | YES                 | INDIRECTLY                        | -           |     |
| 5    | AS4 Executive summary Review of Kangaroo Moth       | NO                   | -           | -                        | E          | YES                        | 1-2         | Recommendations fo    | YES                               | YES                 | YES                               | 1-2         |     |
| 6    | AS5 Kangaroo Mother Care                            | NO                   | -           | -                        | E          | YES                        |             | Conclusion: "KMC wo   | NO                                | NO                  | NO                                | -           |     |
| 7    | AS6 An Assessment of the Status of Kangaroo Mot     | YES                  | 11, 17, 20, | Geographic coverage, c   | D          | YES                        | Throughout  | Analysis according to | YES                               | YES                 | YES                               | Throughout  |     |
| 8    | AS7 The feasibility and acceptability of Kangaroo   | YES                  | 8           | Definition for populati  | D          | YES                        | Throughout  | Perceptions of famil  | YES                               | YES                 | INDIRECTLY                        | 24-5        |     |
| 9    | AS8 A Health System Bottleneck Analysis of Care a   | YES                  | 14, 20      | Staff coverage, coverag  | D          | NO                         |             | KMC not discussed in  | INDIRECTLY                        | YES                 | INDIRECTLY                        |             |     |
| 10   | AS9 Situation analysis of newborn health in Tanza   | YES                  | 19          | Coverage & quality of s  | D          | YES                        | Various pa  | Nothing on KMC in d   | INDIRECTLY                        | UNSURE              | INDIRECTLY                        |             |     |
| 11   | AS10 FIELD ACTION REPORT Challenges and Lesson      | YES                  | Multiple pa | Coverage & quality, cov  | C          | YES                        | 16          | Country progress wit  | YES                               | YES                 | YES                               | 17          |     |
| 12   | AS11 Survey of kangaroo mother care in North Wes    | YES                  | 1,6         | Coverage of services     | C          | YES                        | Multiple sl | Stages of change mod  | YES                               | YES                 | YES                               | Multiple sl |     |
| 13   | AS12 Trip report and action points CHAD             | YES                  | 3           | Universal health covera  | D          | YES                        | Various pa  | Stages of change mod  | YES                               | YES                 | YES                               | 10-15       |     |
| 14   | AS13 Trip report and action points TOGO             | YES                  | 14          | Population-based         | D          | YES                        | Various pa  | Stages of change mod  | YES                               | YES                 | YES                               | 14-18       |     |
| 15   | AS14 Implementation and evaluation of kangaroo      | YES                  | Multiple pa | Population-based         | D          | YES                        | Various pa  | Check in further ana  | YES                               | YES                 | YES                               | Throughout  |     |
| 16   | AS15 Retrospective Evaluation of Kangaroo Mother    | YES                  | 7,20        | Vague                    | D          | YES                        | Various pa  | Check in further ana  | YES                               | YES                 | YES                               | Various pa  |     |
| 17   | AS16 Tracking implementation progress of Kangaro    | NO                   | -           | -                        | E          | YES                        | Various pa  | Check in further ana  | YES                               | YES                 | YES                               | 7-8         |     |
| 18   | AS17 EVALUATION OF KANGAROO MOTHER CARE SE          | NO                   | -           | -                        | E          | YES                        | Various pa  | Check in further ana  | YES                               | YES                 | YES                               | 34-36       |     |
| 19   | AS18 EVALUATION OF KANGAROO MOTHER CARE SE          | NO                   | -           | -                        | E          | YES                        | Various pa  | Check in further ana  | YES                               | YES                 | YES                               | 25-27       |     |
| 20   | AS19 EVALUATION OF KANGAROO MOTHER CARE SE          | YES                  | 18          | Services                 | D          | YES                        | Various pa  | Check in further ana  | YES                               | YES                 | YES                               | 27-30       |     |
| 21   | AS20 EVALUATION OF KANGAROO MOTHER CARE SE          | YES                  | 12          | Coverage of newborn ca   | D          | YES                        | Various pa  | Check in further ana  | YES                               | YES                 | YES                               | 32-33       |     |
| 22   | AS21 The implementation and scale up of facility-b  | YES                  | 1,5,27,28,3 | Coverage of services; Af | D          | YES                        | Various pa  | Check in further ana  | YES                               | YES                 | YES                               | 48-50       |     |
| 23   | AS22 EVALUATION OF KANGAROO MOTHER CARE SE          | YES                  | 42          | Services                 | D          | YES                        | Various pa  | Check in further ana  | YES                               | YES                 | YES                               | 38-41       |     |
| 24   | AS23 Kangaroo Mother Care in the Philippines: Ass   | YES                  | 30          | Health insurance cover   | D          | YES                        | Various pa  | Check in further ana  | YES                               | YES                 | YES                               | 31-32       |     |
| 25   | AS24 Review of Kangaroo Mother Care in Indonesi     | YES                  | 43          | Population-based (also   | D          | YES                        | Various pa  | Check in further ana  | YES                               | YES                 | YES                               | 61-64       |     |
| 26   | AS25 Exploration of Opportunities for Facility-base | YES                  | 35          | MNCH services            | D          | YES                        | Various pa  | Check in further ana  | YES                               | YES                 | YES                               | 34-39       |     |
| 27   | AS26 Situation Analysis Report on the Introduction  | YES                  | 1,41        | KMC services             | D          |                            | Various pa  | Check in further ana  | YES                               | YES                 | YES                               | 45-48       |     |
| 28   | AS27 PUBLIC HOSPITAL-BASED CARE OF SMALL NEW        | YES                  | 7           | Services                 | E          | YES                        | Throughout  | Check in further ana  | YES                               | YES                 | YES                               | 3-7         |     |
| 29   | AS28 PUBLIC HOSPITAL-BASED CARE OF SMALL NEW        | YES                  | Multiple pa | Services                 | D          | YES                        | Throughout  | Check in further ana  | YES                               | YES                 | YES                               | 101-110     |     |
| 30   | AS29 Establishing a Centre of Excellence for Mater  | NO                   | -           | -                        | E          | YES                        | Throughout  | Research centre of ex | INDIRECTLY                        | UNSURE              | INDIRECTLY                        |             |     |
| 31   | AS30 AN EVALUATION OF THE ESTABLISHMENT OF TH       | NO                   | -           | -                        | E          | YES                        | Throughout  | Research centre of ex | INDIRECTLY                        | UNSURE              | INDIRECTLY                        |             |     |
| 32   | AS31 Rapid Health Facility Assessment on Service    | NO                   | -           | -                        | E          | YES                        | 2           | Reasons for not prov  | YES                               | YES                 | YES                               | 3-4         |     |
| 33   |                                                     |                      |             |                          |            |                            |             |                       |                                   |                     |                                   |             |     |
| 34   | 24                                                  | Independent author/s |             |                          |            |                            |             |                       |                                   |                     |                                   |             |     |
| 35   | 77.4%                                               | Media House          | 21          | YES                      | A          | 0                          | 30          | YES                   | YES                               | 25                  | 26                                | 23          | YES |

(AB) Abstracts (49)

(AS) Assessments (31)

(R) Reports (53)

(SP) Slides & pres (60)

(SC) Scal ...

**(R) Reports, briefs, newsletters & blogs**

|    | A    | B                                               | W                                                | X           | Y                      | Z                              | AA                   | AB                      | AC          | AD                         | AE                             | AG                   |             |
|----|------|-------------------------------------------------|--------------------------------------------------|-------------|------------------------|--------------------------------|----------------------|-------------------------|-------------|----------------------------|--------------------------------|----------------------|-------------|
| 1  | 1 ID | 2 Title                                         | 10 Improve/Strengthen (mentioned) (KMC services) | 10a Page #  | 10bKey issues          | 10c H.syst interv. (mentioned) | 10ci Analysis needed | 11 Scale-up (mentioned) | 11a Page #  | 11bKey issues              | 11c H.syst interv. (mentioned) | 11ci Analysis needed | 11d Grading |
| 2  | R1   | Improving Newborn Survival (INS) project: A r   | YES                                              | 9           | Improvement of QoC d   | NO                             | NO                   | NO                      | -           | -                          | NO                             | NO                   | C           |
| 3  | R2   | Kangaroo Mother Care: to prevent deaths due     | NO                                               | -           | -                      | NO                             | NO                   | INDIRECTLY              | 15          | See Remarks 50% by 202     | NO                             | NO                   | E           |
| 4  | R3   | Experiences in Kangaroo Mother Care in Five     | YES                                              | 11          | Re-implementation de   | YES                            | YES                  | YES                     | 3; 5; 8     | Scale-up plans for 3 cou   | INDIRECTLY                     | YES                  | C           |
| 5  | R4   | Iraq hospitals start "Kangaroo Mother Care"     | NO                                               | -           | -                      | NO                             | NO                   | YES                     | 6           | Target another hospital    | NO                             | NO                   | E           |
| 6  | R5   | IMPROVING OUTCOMES OF PREMATURE AND             | YES                                              | 2           | Re-implementation (tr  | YES                            | YES                  | YES                     | 2           | "HCI provides technical    | INDIRECTLY                     | YES                  | C           |
| 7  | R6   | Khanda ndi Mphatso Campaign Report              | NO                                               | -           | Strengthening of colla | YES                            | UNSURE               | NO                      | -           | -                          | NO                             | NO                   | B           |
| 8  | R7   | Development of a National Routine Reporting     | YES                                              | -           | Pilot improved KMC fo  | YES                            | UNSURE               | YES                     | 3           | Roll-put of register to re | YES                            | YES                  | B           |
| 9  | R8   | Improving Uptake of Skin-to-Skin Practice for   | YES                                              | Various pa  | Hypothesis that specia | YES                            | UNSURE               | YES                     | 7           | Scale-up of wrapper        | YES                            | YES                  | B           |
| 10 | R9   | Promoting Kangaroo Mother Care in Selected      | NO                                               | -           | -                      | NO                             | NO                   | NO                      | -           | -                          | NO                             | NO                   | B           |
| 11 | R10  | First Embrace: First biennial progress report   | INDIRECTLY                                       | -           | Status diagrams for ea | NO                             | NO                   | INDIRECTLY              | -           | Benchmarks for EENC sc     | NO                             | NO                   | A           |
| 12 | R11  | Second biennial progress report (2017-2017)     | INDIRECTLY                                       | -           | Status diagrams for ea | NO                             | NO                   | YES                     | 33-34       | Benchmarks for EENC sc     | YES                            | YES                  | A           |
| 13 | R12  | PROBLEMS AND SOLUTIONS FOR THE IMPLEME          | YES                                              | Whole doc   | Solutiosn to problems  | YES                            | YES                  | NO                      | -           | -                          | NO                             | NO                   | C           |
| 14 | R13  | JSI's contribution under Vridhhi for impleme    | YES                                              | 2           | Strengthening system   | YES                            | YES                  | YES                     | -           | The ultimate aim of the t  | YES                            | YES                  | C           |
| 15 | R14  | VRIDDHI PROJECT Improving Maternal, Newbc       | YES                                              | 5-6         | Strengthening system   | YES                            | YES                  | YES                     | 5-6         | Scale-up in 2 states       | YES                            | YES                  | C           |
| 16 | R15  | Kangaroo Mother Care Saves Newborns             | YES                                              | 3           | Way forward (nationa   | YES                            | NO                   | NO                      | -           | -                          | NO                             | NO                   | C           |
| 17 | R16  | Kangaroo Mother Care: Opportunities for Nat     | NO                                               | -           | -                      | NO                             | NO                   | YES                     | 4           | Recommendations for Fu     | YES                            | YES                  | A           |
| 18 | R17  | Kangroo Mother Care in Bangladesh               | YES                                              | 6-7         | Challenges, lessons ar | YES                            | YES                  | YES                     | Whole doc   | Government commitmen       | YES                            | YES                  | A           |
| 19 | R18  | Kangroo Mother Care in Ethiopia                 | YES                                              | 4-5         | Challenges, lessons ar | YES                            | YES                  | YES                     | Whole doc   | Gaps for scale-up and re   | YES                            | YES                  | A           |
| 20 | R19  | Kangroo Mother Care in India                    | YES                                              | 5           | Challenges, lessons ar | YES                            | YES                  | YES                     | 1           | "MOHFW piloted an inte     | YES                            | YES                  | A           |
| 21 | R20  | Kangroo Mother Care in Malawi                   | YES                                              | 5           | Challenges, lessons ar | YES                            | YES                  | YES                     | 5           | Factors that facilitated s | YES                            | YES                  | C           |
| 22 | R21  | Kangroo Mother Care in Nigeria                  | YES                                              | 5-6         | Challenges, lessons ar | YES                            | YES                  | YES                     | 3,6         | Govt not funding scale-u   | YES                            | NO                   | D           |
| 23 | R22  | Kangroo Mother Care in Rwanda                   | YES                                              | 3-4         | Challenges, lessons ar | YES                            | YES                  | YES                     | 1,4         | Factors that facilitated s | YES                            | YES                  | C           |
| 24 | R23  | KMC Acceleration Partnership Community of       | NO                                               | -           | -                      | NO                             | NO                   | YES                     | 15          | To be discussed in next r  | NO                             | NO                   | C           |
| 25 | R24  | Kangaroo Mother Care Acceleration Partners      | YES                                              | Various pa  | Improve quality of ser | YES                            | YES                  | YES                     | Various pa  | One of aims of meeting =   | NO                             | NO                   | C           |
| 26 | R25  | KMC Acceleration Partnership Community of       | NO                                               | -           | -                      | NO                             | NO                   | YES                     | 16          | To be discussed in next r  | NO                             | NO                   | C           |
| 27 | R26  | Africa KAP Supplemental Report December 15      | YES                                              | 9, 59, 103, | Sustainability; docum  | YES                            | YES                  | YES                     | 54-59       | Summary of KMC accele      | YES                            | YES                  | C           |
| 28 | R27  | Asia KAP Supplemental Report December 10-       | YES                                              | 212, 230,   | Improved survival & l  | YES                            | YES                  | YES                     | Multiple sl | Bangladesh (pp158-162)     | YES                            | YES                  | C           |
| 29 | R28  | Meeting Slides KMC Acceleration Partnership     | YES                                              | 114, 490, 5 | Family participative c | YES                            | YES                  | YES                     | Multiple sl | Reports on numbers of h    | YES                            | YES                  | C           |
| 30 | R29  | Neonatal Alliance Toolkit                       | UNSURE                                           | -           | -                      | NO                             | NO                   | YES                     | Various pa  | Reference to interventio   | YES                            | YES                  | C           |
| 31 | R30  | Prematurity and Low Birth Weight                | NO                                               | -           | -                      | NO                             | NO                   | YES                     | Whole doc   | Only reference to MCHIP    | NO                             | NO                   | E           |
| 32 | R31  | Strengthening Small Baby Care at Thanlyin G     | YES                                              | -           | Strengthening of smal  | NO                             | NO                   | NO                      | -           | -                          | NO                             | NO                   | C           |
| 33 | R32  | Brief 3: Facility Readiness and Initiation of K | UNSURE                                           | -           | -                      | NO                             | NO                   | NO                      | -           | -                          | NO                             | NO                   | C           |
| 34 | R33  | GLOBAL HEALTH NEWBORN LEGACY                    | NO                                               | -           | -                      | NO                             | NO                   | YES                     | 7           | -                          | NO                             | NO                   | E           |

(AB) Abstracts (49) (AS) Assessments (31)

**(R) Reports (53)**

(SP) Slides & pres (60)

(SC) Scal ...

(SP) Slides & conference presentations

|    | A      | B                                            | AE                             | AF                   | AG          | AH                 | AI            | AJ           | AK           | AL               | AM           | AN                                                   | AO                  |
|----|--------|----------------------------------------------|--------------------------------|----------------------|-------------|--------------------|---------------|--------------|--------------|------------------|--------------|------------------------------------------------------|---------------------|
| 1  | 1 ID   | 2 Title                                      | 11c H.syst interv. (mentioned) | 11ci Analysis needed | 11d Grading | 13 Qual initiation | 13a Describe  | 14 Qual dose | 14a Describe | 15 Qual duration | 15a Describe | REMARKS                                              | 16 Anal compl EXCEL |
| 44 | SP43   | Accelerating scale up of KMC, what will it t | YES                            | YES                  | C           | NO                 |               | NO           |              | NO               |              | Ends with ENAP                                       |                     |
| 45 | SP44   | Understanding Barriers to Practicing Kang    | NO                             | NO                   | E           | NO                 |               | NO           |              | NO               |              | Qualitative study with parents in Delhi slums        |                     |
| 46 | SP45   | Mapping Exercise of Kangaroo Mother Care     | YES                            | YES                  | C           | NO                 |               | NO           |              | NO               |              | Focus on training                                    |                     |
| 47 | SP46   | A KMC E-learning Platform as an effective t  | YES                            | YES                  | C           | NO                 |               | NO           |              | NO               |              | Focus on e-learning platform and data platform [R    | x                   |
| 48 | SP47   | KANGAROO CARE COVERAGE: FROM PILOT P         | YES                            | YES                  | C           | NO                 |               | NO           |              | NO               |              | Focus on training and expansion of tutors and hos    | x                   |
| 49 | SP48   | UGANDA: Establishing a Regional Learning     | NO                             | NO                   | E           | NO                 |               | NO           |              | NO               |              | Description of learning network - how it is done - n | x                   |
| 50 | SP49   | MALAWI: Using Program-Based Evidence a       | YES                            |                      | C           | NO                 |               | NO           |              | NO               |              | Focus on mentoring                                   |                     |
| 51 | SP50   | Ensuring Quality of Care for Small Babies in | YES                            | YES                  | C           | YES                | p 14-16 perc  | NO           |              | NO               |              | Comprehensive approach                               |                     |
| 52 | SP51   | Assessing and improving quality of care for  | NO                             | NO                   | E           | NO                 |               | NO           |              | NO               |              | Comprehensive approach p32 "KMC should not be        | x                   |
| 53 | SP52   | KMC Implementation Experience MCSP -Te       | NO                             | NO                   | E           | YES                | p8 Admissio   | NO           |              | NO               | pp 9-10 Conf | x                                                    |                     |
| 54 | SP53a8 | Implementing Kangaroo Mother Care (KMC       | INDIRECTLY                     | NO                   | C           | NO                 |               | NO           |              | NO               |              | Presentation and a more comprehensive text           |                     |
| 55 | SP54   | Health Facility Assessment for Care of Prer  | NO                             | NO                   | C           | YES                | p4 14% of eli | NO           |              | NO               |              | Criteria for facility readiness - see also AS31      |                     |
| 56 | SP55   | Summary of the conclusions of the worksh     | NO                             | NO                   | E           | NO                 |               | NO           |              | NO               |              | Workshop topics                                      |                     |
| 57 | SP56   | Kangaroo mother care Sustainability and f    | INDIRECTLY                     | YES                  | C           | NO                 |               | NO           |              | NO               |              |                                                      |                     |
| 58 | SP57   | THE FUTURE OF KMC: ROLE OF NGO's The Ph      | INDIRECTLY                     | YES                  | E           | NO                 |               | NO           |              | NO               |              | Role of NGO: focus on advocacy, training and othe    | x                   |
| 59 | SP58   | ROLE OF NGOS IN PROMOTION OF KMC EXPE        | INDIRECTLY                     | YES                  | E           | NO                 |               | NO           |              | NO               |              | Role of NGO: focus on promotion and training         |                     |
| 60 | SP59   | IMPROVING AVAILABILITY, QUALITY AND USE      | YES                            | YES                  | B           | YES                | p9 "Estimate  | NO           |              | NO               |              | HMIS - check with R43                                |                     |
| 61 | SP60   | Use of routine data: Monitoring KMC throu    | NO                             | NO                   | D           | YES                | p19 "ESTIMA   | YES          | p24 ">80% of | YES              | p24          | Also check notes at the bottom of each slide         |                     |
| 62 | SP61   | Estrategia Programas Madre Canguro en C      | YES                            | YES                  | E           |                    |               | NO           |              | NO               |              |                                                      |                     |
| 63 | SP62   | Lineamientos técnicos para la implementa     | NO                             | NO                   | E           |                    |               | NO           |              | NO               |              |                                                      |                     |
| 64 |        |                                              |                                |                      |             |                    |               |              |              |                  |              |                                                      |                     |
| 65 | 33     |                                              |                                |                      |             |                    |               |              |              |                  |              |                                                      |                     |
| 66 | 53.2%  | Independent author/s                         |                                |                      |             |                    |               |              |              |                  |              |                                                      |                     |
| 67 |        | Media House                                  | 25                             | 24                   |             | 0                  | 5             | YES          | 1            |                  | 1            |                                                      |                     |
| 68 |        | Funding agency                               | 30                             | 37                   |             | 2                  | 55            | NO           | 61           |                  | 61           |                                                      |                     |
| 69 |        | Development agency                           | 0                              | 0                    |             | 25                 | 0             | UNSURE       | 0            |                  | 0            |                                                      |                     |
| 70 |        | Govt                                         | 0                              | 0                    |             | 8                  | 0             | N/A          | 0            |                  | 0            |                                                      |                     |
| 71 |        | Other                                        | 7                              | 0                    |             | 27                 | 0             | INDIRECTLY   | 0            |                  | 0            |                                                      |                     |
| 72 |        | Missing                                      | 0                              | 1                    |             | 0                  | 2             | Missing      | 0            |                  | 0            |                                                      |                     |
| 73 |        | Total                                        | 62                             | 62                   |             | 62                 | 62            | Total        | 62           |                  | 62           |                                                      |                     |

(AB) Abstracts (49)

(AS) Assessments (31)

(R) Reports (56)

(SP) Slides & pres (62)

(SC) Scal ...

(SC) Scale-up (and implementation guides)

| A  | B                                                                                 | C                        | D                                      | E                      | F                   | G                                                                                     | H                 | I                     | J                                                                       | K                          |
|----|-----------------------------------------------------------------------------------|--------------------------|----------------------------------------|------------------------|---------------------|---------------------------------------------------------------------------------------|-------------------|-----------------------|-------------------------------------------------------------------------|----------------------------|
| 1  | 2 Title                                                                           | Author                   | Publisher                              | Place of publication   | Date published      | URL                                                                                   | URL date accessed | Types of document     | REMARKS                                                                 | 17 Anal compl NVIVO (Date) |
| 2  | SC01 Kangaroo Mother Care Implementation Guide                                    | USAID/MCHIP/ Save        | MCHIP Jhpiego                          | Washington DC          | 2012                | <a href="https://www.mchip.org/">https://www.mchip.org/</a>                           | 2021/09/09        | Guide                 |                                                                         | 2021/09/09                 |
| 3  | SC02 Implementation Workbook for Kangaroo Mother Care                             | Anne-Marie Bergh         | MRC Unit for Maternal and Child Health | Pretoria, South Africa | 2002                | <a href="https://www.health.gov.za/">https://www.health.gov.za/</a>                   | 2021/09/19        | Guide                 |                                                                         | 2021/09/19                 |
| 4  | SC03 Accelerating the effective scaling of Kangaroo Mother Care                   | Nathaniel Foote, G       | Early Childhood Development            |                        | 2017                | <a href="https://bernardvan.com/">https://bernardvan.com/</a>                         | 2021/08/10        | Article               |                                                                         | 2021/09/11                 |
| 5  | SC04 KANGAROO MOTHER CARE & OPTIMAL FEEDING GUIDE                                 | GOI                      | Child Health Division                  | New Delhi              | September 2014      | <a href="https://nhm.gov.in/">https://nhm.gov.in/</a>                                 | 2021/09/15        | Guide                 | 2 columns                                                               | 2021/09/19                 |
| 6  | SC05 KANGAROO MOTHER CARE: Clinical Implementation Guide                          | Kenya Ministry of Health | Kenya Ministry of Health               | (Nairobi)              | 2016                | -                                                                                     | -                 | Guide                 |                                                                         | 2021/09/13                 |
| 7  | SC06 Atenção Humanizada ao Recém-Nascido                                          | Ministry of Health       | MINISTRY OF HEALTH                     | Brasilia               | 2017 (3rd ed)       | <a href="https://bvsms.saude.gov.br/">https://bvsms.saude.gov.br/</a>                 | 2021/09/19        | Guide                 | Module 1 English translation: 1 The Kangaroo Mother Care                | 2021/09/19                 |
| 8  | SC07 Introducing and sustaining EENC in hospitals                                 | WHO WPR                  | World Health Organization              | Manila                 | 2018                | <a href="https://apps.who.int/">https://apps.who.int/</a>                             | 2021/09/19        | Guide                 | First Embrace; tables                                                   | 2021/09/20                 |
| 9  | SC08 THE PATHWAY TO HIGH EFFECTIVE COVERAGE                                       | Lara Vaz, Tanya Gu       | Save the Children, E                   |                        | no date             | <a href="https://resourcecenter.org/">https://resourcecenter.org/</a>                 | 2021/09/20        | Poster                | NB for scale up ideas; poster; 3 columns                                | 2021/09/20                 |
| 10 | SC09a Scaling up kangaroo mother care in the Philippines                          | Anthony Patrick Cal      | BMJ Global Health                      |                        | 2021                | <a href="https://gh.bmj.com/">https://gh.bmj.com/</a>                                 | 2021/09/20        | Article               | 2 columns; BMJ Global Health 2021;6:e006492. doi:10.1136/gh-2021-000492 | 2021/09/20                 |
| 11 | SC09b Capacity Development on Hospital Policy                                     | Presenters listed        |                                        |                        | no date             | -                                                                                     | -                 | Other                 | Received from Sookee                                                    | 2021/09/20                 |
| 12 | SC10 Lessons learned from the introduction and scaling up of Kangaroo Mother Care | Joseph de Graft-Johnson  | Save the Children, A                   |                        | 2007                | <a href="https://www.health.gov.za/">https://www.health.gov.za/</a>                   | 2021/09/20        | Poster                | Poster; 3 columns                                                       | 2021/09/20                 |
| 13 | SC11 KMC Acceleration Framework                                                   | Save the Children        |                                        |                        | June 2015           | <a href="https://www.health.gov.za/">https://www.health.gov.za/</a>                   | 2021/09/20        | Other                 | NB Only a diagram; includes the building blocks                         | 2021/09/20                 |
| 14 | SC12 Kangaroo Mother Care—High on Evidence                                        | Amrita Misra, Sarah      | JSI                                    |                        | 12 Oct 2017         | <a href="https://www.jsi.com/">https://www.jsi.com/</a>                               | 2021/09/20        | Brief                 | Viewpoint (brief)                                                       | 2021/09/20                 |
| 15 | SC13 JSI CONTRIBUTES TO SCALE-UP OF KANGAROO MOTHER CARE                          | JSI                      |                                        |                        | no date             | <a href="https://www.jsi.com/">https://www.jsi.com/</a>                               | 2021/09/20        | Infographic           | Infographic                                                             | 2021/09/20                 |
| 16 | SC14 Informing the design of a trial of kangaroo mother care                      | Dr Melissa Morgan        | LSHTM                                  | London                 | August 2020         | <a href="https://researchonline.lshtm.ac.uk/">https://researchonline.lshtm.ac.uk/</a> | 2021/09/20        | Thesis                | PhD thesis                                                              | 2021/09/20                 |
| 17 | SC15 'Scaling-up is a craft not a science': Catalina                              | Spicer N, Bhattacharya   | Soc Sci Med                            |                        | 2014                | <a href="https://www.sciencedirect.com/">https://www.sciencedirect.com/</a>           | 2021/09/22        | Article               | 2 columns; Soc Sc Med 2014;121:30-38; KMC not mentioned                 | 2021/09/22                 |
| 18 | SC16 National Newborn Health Program Implementation Guide                         | Ministry of Health       | MoHFW                                  | Bangladesh             | 2017 (1st ed); 2019 | <a href="https://www.researchgate.net/">https://www.researchgate.net/</a>             | 2021/09/22        | Guide                 | Extracts taken                                                          | 2021/09/23                 |
| 19 | SC17a Scaling up Kangaroo Mother Care in Ethiopia                                 | Mony PK, Tadele H,       | BMJ Global Health                      |                        | 2021                | <a href="https://gh.bmj.com/">https://gh.bmj.com/</a>                                 | 2021/09/22        | Article               | 2 columns; BMJ Global Health. 2021; 6: e005905                          | 2021/09/22                 |
| 20 | SC17b Scaling up Kangaroo Mother Care - supplementary                             | Mony PK, Tadele H,       | BMJ Global Health                      |                        | 2021                | <a href="https://gh.bmj.com/">https://gh.bmj.com/</a>                                 | 2021/09/22        | Supplement            | BMJ Global Health. 2021; 6: e005905                                     | 2021/09/23                 |
| 21 |                                                                                   |                          |                                        |                        |                     |                                                                                       |                   |                       |                                                                         |                            |
| 22 | 19                                                                                |                          | Journal publications                   |                        |                     |                                                                                       |                   | Guide                 |                                                                         | 7                          |
| 23 | 100%                                                                              |                          |                                        |                        |                     |                                                                                       |                   | Article               |                                                                         | 4                          |
| 24 |                                                                                   |                          |                                        |                        |                     |                                                                                       |                   | Supplement to article |                                                                         | 1                          |
| 25 |                                                                                   |                          |                                        |                        |                     |                                                                                       |                   | Poster                |                                                                         | 2                          |
| 26 |                                                                                   |                          |                                        |                        |                     |                                                                                       |                   | Thesis                |                                                                         | 1                          |
| 27 |                                                                                   |                          |                                        |                        |                     |                                                                                       |                   | Brief                 |                                                                         | 1                          |
| 28 |                                                                                   |                          |                                        |                        |                     |                                                                                       |                   | Infographic           |                                                                         | 1                          |
| 29 |                                                                                   |                          |                                        |                        |                     |                                                                                       |                   | Other                 |                                                                         | 2                          |
| 30 |                                                                                   |                          |                                        |                        |                     |                                                                                       |                   |                       |                                                                         | 19                         |
| 31 |                                                                                   |                          |                                        |                        |                     |                                                                                       |                   |                       |                                                                         |                            |
| 32 |                                                                                   |                          |                                        |                        |                     |                                                                                       |                   |                       |                                                                         |                            |
| 33 |                                                                                   |                          |                                        |                        |                     |                                                                                       |                   |                       |                                                                         |                            |
| 34 |                                                                                   |                          |                                        |                        |                     |                                                                                       |                   |                       |                                                                         |                            |
| 35 |                                                                                   |                          |                                        |                        |                     |                                                                                       |                   |                       |                                                                         |                            |
| 36 |                                                                                   |                          |                                        |                        |                     |                                                                                       |                   |                       |                                                                         |                            |
| 37 |                                                                                   |                          |                                        |                        |                     |                                                                                       |                   |                       |                                                                         |                            |
