# Supplementary material for: Programmatic implementation of kangaroo mother care: a systematic synthesis of grey literature
Source: bioRxiv or medRxiv preprint supplement (doi:10.1101/2023.04.05.23288153), 2023-04-05
Supplement: Supplementary file [file media-4.pdf]

Supplemental file 4 Documents analysed with NVivo

|    | File name                                                                                           | Nodes | References |
|----|-----------------------------------------------------------------------------------------------------|-------|------------|
| 1  | AS01 HNN 10-Nigeria-2011-KMC-review-report_0 2021-08-07                                             | 31    | 136        |
| 2  | AS06 MCSP Dominican Republic -KMCAssessmentReport - 2021-07-23                                      | 30    | 108        |
| 3  | AS07 MCSP Myanmar_Feasibility & Acceptability of KMC at Taunggyi_Report 2021-07-27                  | 31    | 126        |
| 4  | AS08 MCSP Malawi-BNA-Report-FINAL 2021-07-23                                                        | 32    | 174        |
| 5  | AS10 UNICEF SURVEY 25 countries - long manuscript with tables & boxes                               | 18    | 32         |
| 6  | AS11 South Africa NW Prov KMC survey 2015 presentation                                              | 25    | 52         |
| 7  | AS12 UNICEF Chad Trip report FINAL                                                                  | 28    | 49         |
| 8  | AS13 UNICEF Togo Trip report ENGLISH Final draft                                                    | 31    | 47         |
| 9  | AS14 Indonesia 2009-10 KMC FINAL REPORT - Final_Sep28 - confidential (AMB)                          | 33    | 86         |
| 10 | AS15 SC Malawi KMC Retrospective Study Report 2008 - final-final                                    | 26    | 47         |
| 11 | AS16 SNL Brief Tracking Implementation Progress for KMC 2021-07-23                                  | 25    | 52         |
| 12 | AS16a SNL evaluation 2012 Multi-country KMC evaluation brief v2                                     | 8     | 9          |
| 13 | AS17 SNL evaluation 2012 Malawi KMC report - FINAL FINAL                                            | 14    | 16         |
| 14 | AS18 SNL evaluation 2012 Mali KMC Report                                                            | 19    | 37         |
| 15 | AS19 SNL evaluation 2012 Rwanda KMC report - FINAL 1                                                | 22    | 39         |
| 16 | AS20 SNL evaluation 2012 Uganda KMC report - FINAL                                                  | 19    | 26         |
| 17 | AS21 Deep Dive 2015-01-05 KMC Asia consolidated report FINAL -table disabled                        | 46    | 160        |
| 18 | AS22 Deep dive Asia India KMC report FINAL 2015-04-15                                               | 9     | 13         |
| 19 | AS23 Deep Dive Asia KMC Assessment Philippines_Final Report 5                                       | 35    | 135        |
|    | AS24 Deep Dive Asia kmc indonesia final 20 jan hp - CANNOT OPEN                                     | 0     | 0          |
| 20 | AS25 Deep Dive Asia KMC Pakistan report - FINAL - 2014-11-12                                        | 20    | 88         |
| 21 | AS26 Deep Dive Asia Situation Analysis_KMC_Bangladesh_April 24 2014_the final                       | 0     | 0          |
|    | AS27 SC Nigeria KMC-brief-18Aug17-A4-LOGOS (1) CANNOT PROCESS                                       | 0     | 0          |
|    | AS27a SC Nigeria KMC-brief-18Aug17-A4-LOGOS (1) CANNOT PROCESS                                      | 0     | 0          |
| 22 | AS28 SC Nigeria Report Care of Small Newborns final (2017)+C53                                      | 49    | 398        |
| 23 | AS31 HNN Ehtiopia KMC_Facilities_Brief_ 2021-07-24                                                  | 17    | 26         |
| 24 | SC01 MCHIP KMC Implementation Guide 2021                                                            | 31    | 120        |
| 25 | SC02a C KMC WORKBOOK - CONTENTS, INTRO - REFORMATTED                                                | 4     | 7          |
|    | SC02b D KMC WORKBOOK - PART 1 - REFORMATTED                                                         | 14    | 20         |
|    | SC02c E KMC WORKBOOK- PARTS 2 & 3 - REFORMATTED                                                     | 17    | 28         |
|    | SC02d F KMC WORKBOOK - PART 4 - REFORMATTED                                                         | 19    | 28         |
|    | SC02e G KMC WORKBOOK - PART 5 - REFORMATTED                                                         | 7     | 12         |
|    | SC02f H KMC WORKBOOK - PARTS 6 & 7 - REFORMATTED                                                    | 9     | 16         |
|    | SC02g I KMC WORKBOOK - HANDOUTS - REFORMATTED                                                       | 1     | 1          |
| 26 | SC03 ECM17_11_KMC_Foote                                                                             | 11    | 19         |
| 27 | SC04 (G1) KENYA KANGAROO+MOTHER+CARE+IMPLEMENTATION+GUIDELINES+2016(1) (002)                        | 19    | 66         |
| 28 | SC05 (G2) India Operational_Guidelines-KMC_&_Optimal_feeding_of_Low_Birth_Weight_Infants 2021-07-20 | 28    | 145        |
| 29 | SC06 Brazil Atencao_humanizada_metodo_canguru_MODULE 1 ENGLISH 2021-07-31                           | 10    | 29         |
| 30 | SC07 HNN First Embrace Introducing and sustaining EENC in hospitals - teaching module 2021-07-24    | 23    | 69         |
| 31 | SC08 SC Pathway_to scale up poster 2021-07-30                                                       | 8     | 26         |
| 32 | SC09a Calibo Philippines KMC scale up BMJ Glob Health 2021                                          | 25    | 79         |
| 33 | SC09b Philippines 6 CSBPOLICY_Schedule of Activities_revised (1)                                    | 7     | 11         |
| 34 | SC10 HNN Lessons KMC expansion poster_final 2021-07-25                                              | 13    | 18         |
| 35 | SC11 HNN SC KMC Acceleration Framework 2021-07-24                                                   | 10    | 17         |
| 36 | SC12 JSI India Viewpoint Kangaroo Mother Care-High on Evidence, Low on Reach                        | 10    | 13         |
| 37 | SC13 JSI India Vriddhi RMNCH-A KMC-Infographic 2021-07-24                                           | 2     | 2          |
| 38 | SC14 Medvedev-2020_Informing_the_design_of_a_trial - scale-up                                       | 31    | 116        |
| 39 | SC15 NB HNN Scaling Up Craft Not Science_SocSciMedicine                                             | 22    | 87         |
| 40 | SC16a Bangladesh NNHP Implementation Toolkit_English EXTRACTS                                       | 20    | 51         |
| 41 | SC17a Mony Scaling_up_KMC_Ethiopia_and_India BMJ GH 2021                                            | 25    | 71         |
| 42 | SC17b Mony bmjgh-2021-005905supp001_data_supplement                                                 | 10    | 24         |

37 Grey documents  
4 Articles  
1 Article supplement
