# Supplementary material for: Programmatic implementation of kangaroo mother care: a systematic synthesis of grey literature
Source: bioRxiv or medRxiv preprint supplement (doi:10.1101/2023.04.05.23288153), 2023-04-05
Supplement: Supplementary file [file media-6.pdf]

Supplemental files 6 Document types and levels of importance

| <b>Documents types for first round analysis</b> |                                                       |             |                                             |             |                                                 |             |                                              |             |                                              |             |              |             |
|-------------------------------------------------|-------------------------------------------------------|-------------|---------------------------------------------|-------------|-------------------------------------------------|-------------|----------------------------------------------|-------------|----------------------------------------------|-------------|--------------|-------------|
| <b>Document type</b>                            | <b>Abstracts (posters, summaries, working groups)</b> |             | <b>Assessments, evaluations and reviews</b> |             | <b>Reports, briefs, newsletters &amp; blogs</b> |             | <b>Slides &amp; conference presentations</b> |             | <b>Implementation and scale-up documents</b> |             | <b>TOTAL</b> |             |
|                                                 | <b>n</b>                                              | <b>%</b>    | <b>n</b>                                    | <b>%</b>    | <b>n</b>                                        | <b>%</b>    | <b>n</b>                                     | <b>%</b>    | <b>n</b>                                     | <b>%</b>    | <b>n</b>     | <b>%</b>    |
| Report                                          | 19                                                    | 39%         | 27                                          | 87%         | 25                                              | 45%         | 0                                            | 0%          | 0                                            | 0%          | 71           | 33%         |
| Brief                                           | 0                                                     | 0%          | 4                                           | 13%         | 16                                              | 29%         | 0                                            | 0%          | 1                                            | 5%          | 21           | 10%         |
| Conference abstract                             | 23                                                    | 47%         | 0                                           | 0%          | 0                                               | 0%          | 0                                            | 0%          | 0                                            | 0%          | 23           | 11%         |
| Poster                                          | 7                                                     | 14%         | 0                                           | 0%          | 0                                               | 0%          | 0                                            | 0%          | 2                                            | 11%         | 9            | 4%          |
| Conference presentation                         | 0                                                     | 0%          | 0                                           | 0%          | 0                                               | 0%          | 62                                           | 100%        | 0                                            | 0%          | 62           | 29%         |
| Blog                                            | 0                                                     | 0%          | 0                                           | 0%          | 3                                               | 5%          | 0                                            | 0%          | 0                                            | 0%          | 3            | 1%          |
| Newsletter                                      | 0                                                     | 0%          | 0                                           | 0%          | 7                                               | 13%         | 0                                            | 0%          | 0                                            | 0%          | 7            | 3%          |
| Dissertation/thesis                             | 0                                                     | 0%          | 0                                           | 0%          | 1                                               | 2%          | 0                                            | 0%          | 1                                            | 5%          | 2            | 1%          |
| Other                                           | 0                                                     | 0%          | 0                                           | 0%          | 4                                               | 7%          | 0                                            | 0%          | 15                                           | 79%         | 19           | 9%          |
| <b>TOTAL</b>                                    | <b>49</b>                                             | <b>100%</b> | <b>31</b>                                   | <b>100%</b> | <b>56</b>                                       | <b>100%</b> | <b>62</b>                                    | <b>100%</b> | <b>19</b>                                    | <b>100%</b> | <b>217</b>   | <b>100%</b> |

| <b>Documents analysed in the first round</b>              |                 |            |                |           |                |           |       |
|-----------------------------------------------------------|-----------------|------------|----------------|-----------|----------------|-----------|-------|
|                                                           | <b>In-depth</b> |            | <b>Nuggets</b> |           | <b>Nothing</b> |           |       |
| (AB) Abstracts (also posters, summaries & working groups) | <b>49</b>       | <b>16</b>  | 32.7%          | <b>17</b> | 34.7%          | 16        | 32.7% |
| (AS) Assessments, evaluations and reviews                 | <b>31</b>       | <b>24</b>  | 77.4%          | <b>7</b>  | 22.6%          | 0         | 0.0%  |
| (R) Reports, briefs, newsletters & blogs                  | <b>56</b>       | <b>27</b>  | 48.2%          | <b>24</b> | 42.9%          | 5         | 8.9%  |
| (SP) Slides & conference presentations                    | <b>62</b>       | <b>32</b>  | 51.6%          | <b>14</b> | 22.6%          | 16        | 25.8% |
| (SC) Scale-up (and implementation guides)                 | <b>19</b>       | <b>19</b>  | 100.0%         | <b>0</b>  | 0.0%           | 0         | 0.0%  |
| <b>TOTAL</b>                                              | <b>217</b>      | <b>118</b> |                | <b>62</b> |                | <b>37</b> |       |
